# Supplementary material for: Thermally deposited copper(i) thiocyanate thin film: an efficient and sustainable approach for the hole transport layer in perovskite solar cells
Source: Royal Society of Chemistry journal article supplement (doi:10.1039/d4ya00034j), 2024-01-01
Supplement: d4ya00034j1.pdf [file d4ya00034j1.pdf]

## Supporting Information

### Thermally deposited copper(I) thiocyanate thin film: an efficient and sustainable approach for hole transport layer in perovskite solar cells

Rashi Kedia,<sup>1,2</sup> Manisha Balkhandia,<sup>1,2</sup> Manisha Khatak,<sup>1,2</sup> Neeraj Chaudhary,<sup>1</sup> Asit Patra<sup>1,2,\*</sup>

<sup>1</sup>Photovoltaic Metrology Section, Advanced Materials & Device Metrology Division, CSIR-National Physical Laboratory, Dr K. S. Krishnan Marg, New Delhi-110012, India

<sup>2</sup>Academy of Scientific and Innovative Research (AcSIR), Ghaziabad-201002, India

\*Corresponding Author: [apatra@nplindia.org](mailto:apatra@nplindia.org), [apatra.npl@nic.in](mailto:apatra.npl@nic.in)

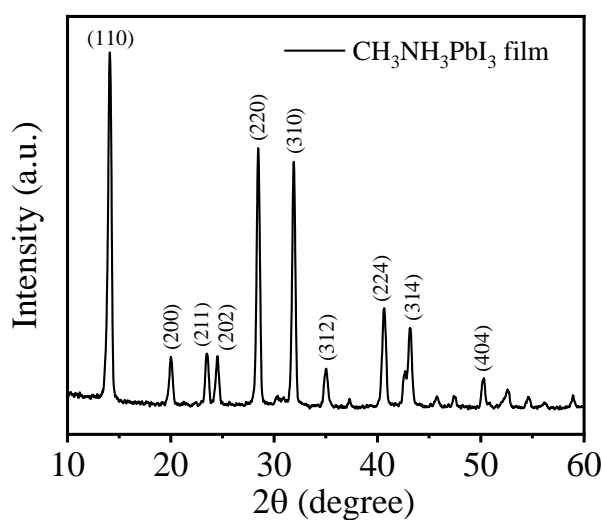

**Figure S1.** XRD patterns of  $\text{CH}_3\text{NH}_3\text{PbI}_3$  film spin-casted on ITO-coated glass substrate.

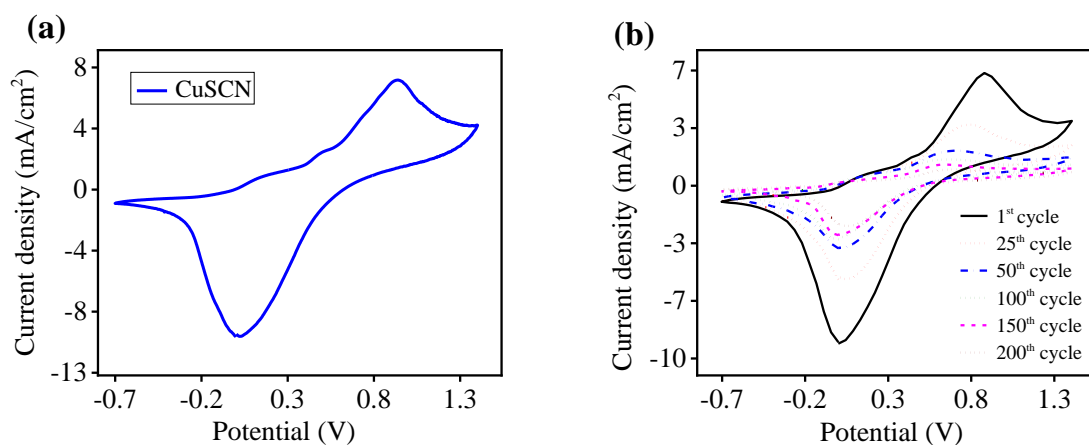

**Figure S2.** a) CV curve of thermally deposited CuSCN film on GC electrode in the potential range of -0.7 to 1.3 V at 100 mV/s in DMF solution containing 0.1 M TBAClO<sub>4</sub> as a supporting electrolyte. b) Electrochemical stability test of CuSCN film on GC in the same potential window, indicating dissolution of the film in DMF solution.

**Table S1** The percentage (%) charge and (%) total charge loss of thermally deposited CuSCN film on GC during the repetitive cycling between -0.3 and 0.3 V for 500 cycles.

| No. of cycles | % Charge | % Total charge loss |
|---------------|----------|---------------------|
| 1             | 100      | 0                   |
| 50            | 90       | 10                  |
| 100           | 83       | 17                  |
| 200           | 79       | 21                  |
| 300           | 77       | 23                  |
| 500           | 75       | 25                  |

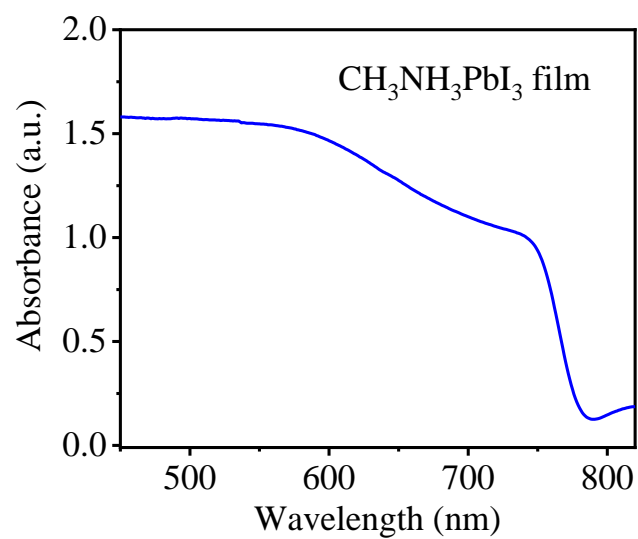

**Figure S3.** UV-visible spectrum of perovskite film spin-casted on quartz substrate.

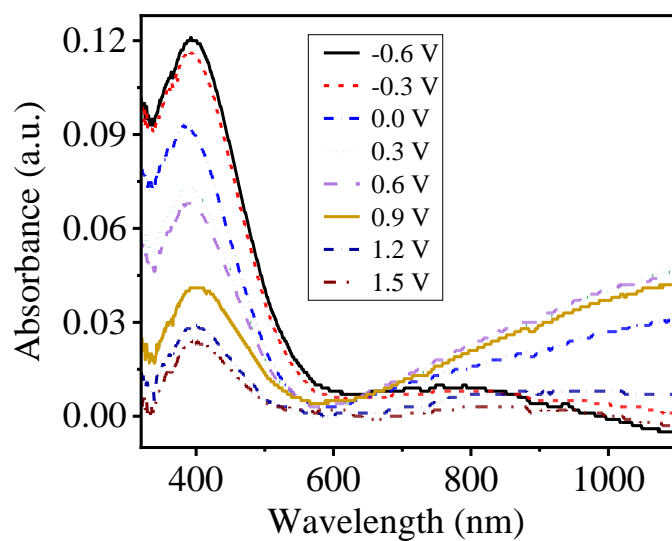

**Figure S4.** Spectroelectrochemistry of thermally deposited  $\text{CuSCN}$  film on ITO surface.

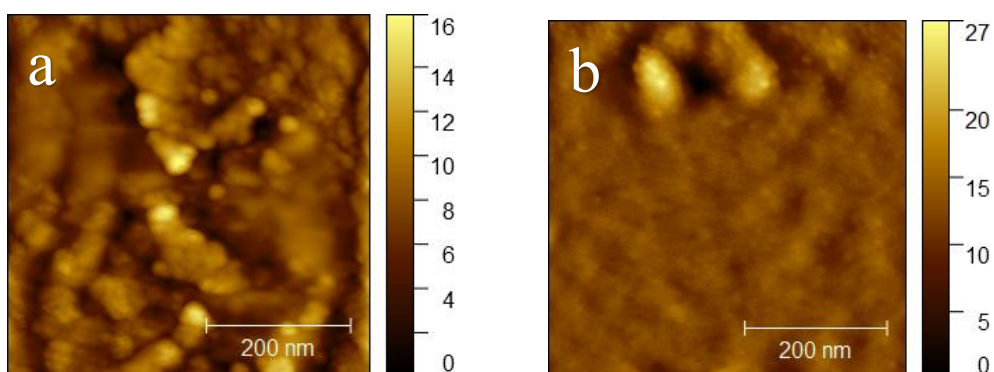

**Figure S5.** AFM height images (scan area of  $0.5 \mu\text{m}^2$ ) of thermally deposited CuSCN thin films on ITO-coated glass substrates and then annealed at (a)  $150 \text{ }^\circ\text{C}$  and (b)  $200 \text{ }^\circ\text{C}$ , which exhibits the surface  $R_{\text{RMS}}$  value of 5.2 and 6.4 nm, respectively.

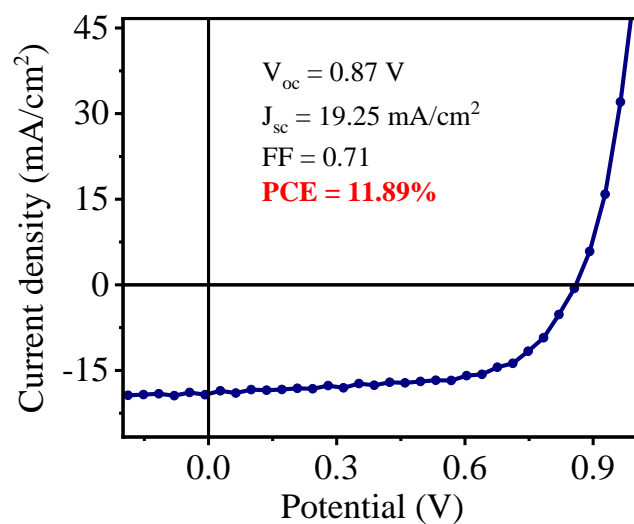

**Figure S6.** J-V curve of solution-processed CuSCN-based perovskite solar cells.
